# Supplementary material for: Light-soaking effects on ZnO-nanorods/polymer hybrid photovoltaics
Source: Royal Society of Chemistry journal article supplement (doi:10.1039/c5ra00435g), 2015-01-01
Supplement: c5ra00435g1.pdf [file c5ra00435g1.pdf]

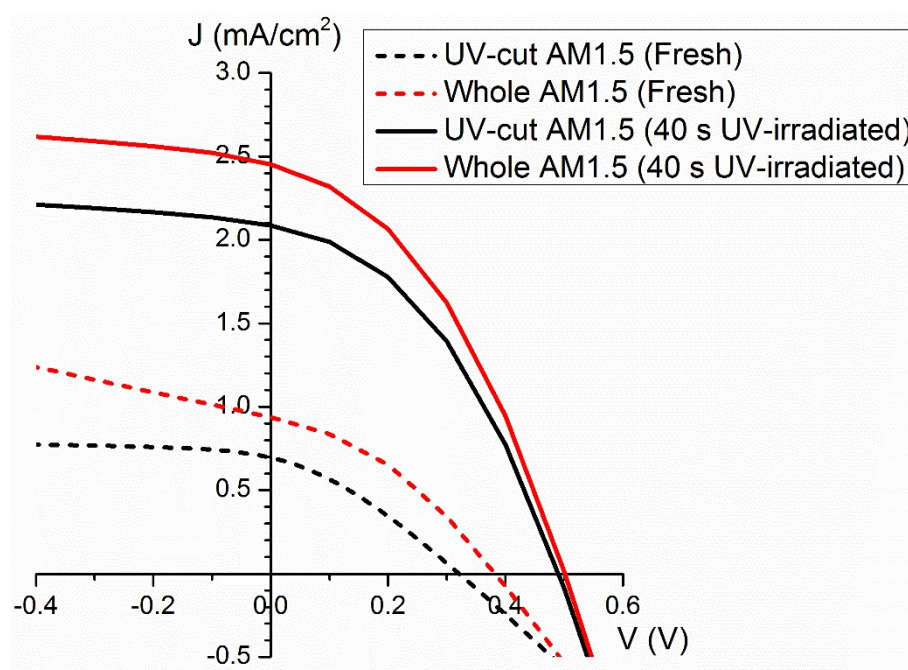

Figure S1: *J-V* curves of an HPV device with a P3HT/ZnO-NRs junction measured before (broken lines) and after UV irradiation for 40 s (solid lines). They were obtained under an AM 1.5 spectrum with a UV-cut filter (black lines) and without a UV-cut filter (red lines). The red broken line was affected by the light soaking effect during the measurement. Irradiation conditions for UV irradiation: AM 1.5, 100 mW/cm<sup>2</sup>.

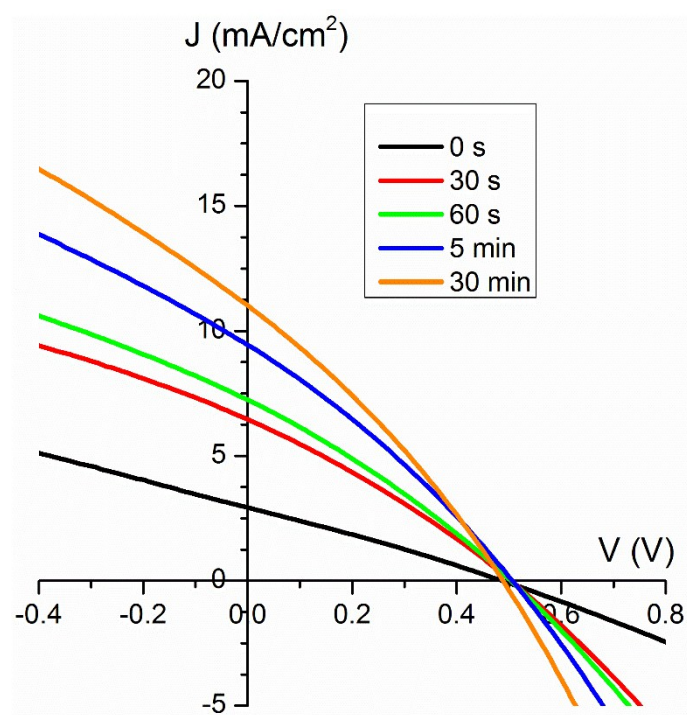

Figure S2:  $J$ - $V$  curves of an OPV device having a P3HT:PCBM bulk heterojunction and ZnO-NRs as an electron accepting layer measured repeatedly after UV irradiation for certain periods. Cumulative UV irradiation times are shown in the legend. Irradiation conditions: AM 1.5, 100  $\text{mW}/\text{cm}^2$  for UV irradiation; the same but the UV component was removed for  $J$ - $V$  measurements.
